# Supplementary material for: Electronic structure modulation of MnO2 by Ru and F incorporation for efficient proton exchange membrane water electrolysis
Source: Royal Society of Chemistry journal article supplement (doi:10.1039/d2ta06066c), 2022-01-01
Supplement: d2ta06066c1.pdf [file d2ta06066c1.pdf]

## Electronic Supplementary Information

### **Electronic Structure Modulation of MnO<sub>2</sub> by Ru and F Incorporation for Efficient Proton Exchange Membrane Water Electrolysis**

*Dongwon Kim,<sup>a</sup> Anastasiia Voronova,<sup>ab</sup> Sol Kim,<sup>ab</sup> Jin Young Kim,<sup>ab</sup> Hee-Young Park,<sup>a</sup> Jong  
Hyun Jang,<sup>ab</sup> and Bora Seo<sup>\*ab</sup>*

<sup>a</sup> Hydrogen and Fuel Cell Research Center, Korea Institute of Science and Technology (KIST), Seoul 02792, Republic of Korea.

<sup>b</sup> Division of Energy & Environment Technology, KIST School, University of Science and Technology (UST), Seoul 02792, Republic of Korea.

\* E-mail: [brseo@kist.re.kr](mailto:brseo@kist.re.kr) (B. Seo)

# Contents

|                       |    |
|-----------------------|----|
| <b>Fig. S1</b> .....  | 4  |
| <b>Fig. S2</b> .....  | 5  |
| <b>Fig. S3</b> .....  | 6  |
| <b>Fig. S4</b> .....  | 7  |
| <b>Fig. S5</b> .....  | 8  |
| <b>Fig. S6</b> .....  | 9  |
| <b>Fig. S7</b> .....  | 10 |
| <b>Fig. S8</b> .....  | 11 |
| <b>Fig. S9</b> .....  | 12 |
| <b>Fig. S10</b> ..... | 13 |
| <b>Fig. S11</b> ..... | 14 |
| <b>Fig. S12</b> ..... | 15 |
| <b>Fig. S13</b> ..... | 16 |
| <b>Fig. S14</b> ..... | 16 |
| <b>Table S1</b> ..... | 17 |
| <b>Table S2</b> ..... | 18 |
| <b>Table S3</b> ..... | 19 |
| <b>Table S4</b> ..... | 19 |
| <b>Table S5</b> ..... | 20 |
| <b>Table S6</b> ..... | 21 |
| <b>Table S7</b> ..... | 22 |

|                         |    |
|-------------------------|----|
| <b>Table S8</b> .....   | 22 |
| <b>Table S9</b> .....   | 23 |
| <b>Table S10</b> .....  | 23 |
| <b>Table S11</b> .....  | 24 |
| <b>Table S12</b> .....  | 24 |
| <b>Table S13</b> .....  | 25 |
| <b>Table S14</b> .....  | 25 |
| <b>Table S15</b> .....  | 26 |
| <b>Table S16</b> .....  | 26 |
| <b>References</b> ..... | 27 |

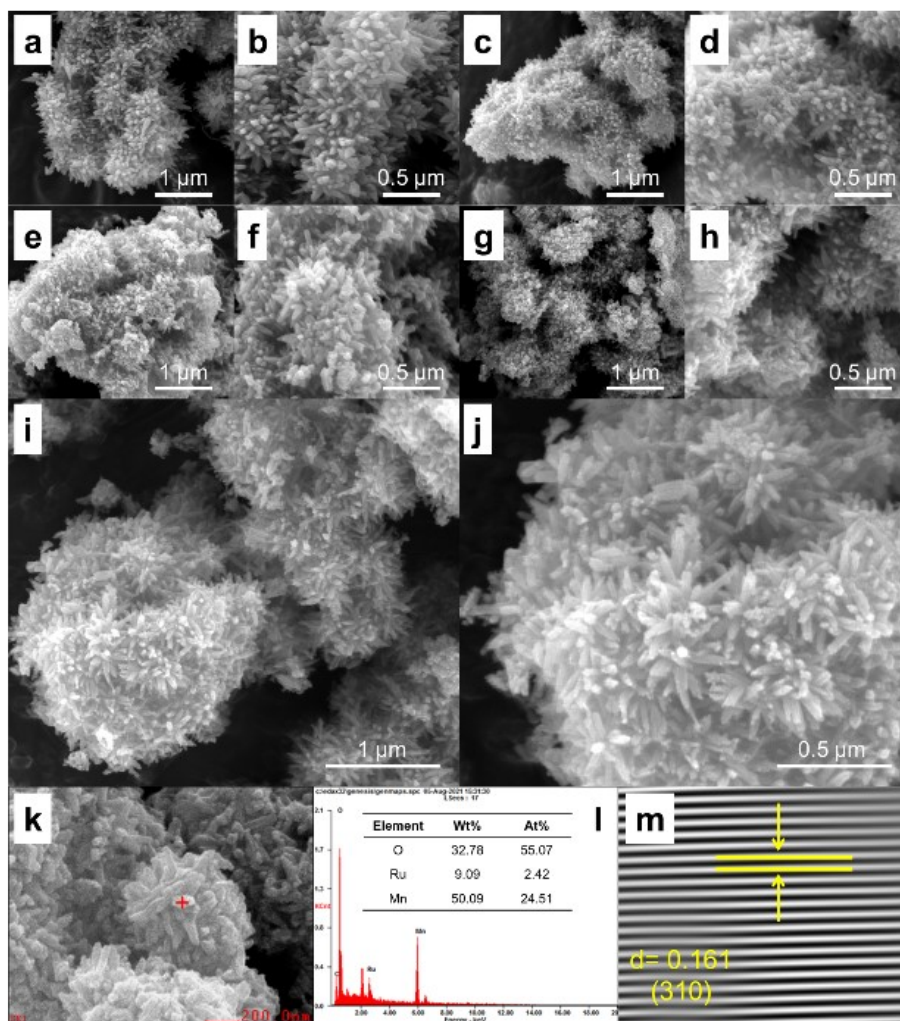

**Fig. S1** SEM images of (a and b)  $\alpha$ - $\text{MnO}_2$ , (c and d)  $(\text{Mn}_{0.94}\text{Ru}_{0.06})\text{O}_2$ , (e and f)  $(\text{Mn}_{0.96}\text{Ru}_{0.04})\text{O}_2:2.5\text{F}$ , (g and h)  $(\text{Mn}_{0.93}\text{Ru}_{0.07})\text{O}_2:2.5\text{F}$ , and (i and j)  $(\text{Mn}_{0.94}\text{Ru}_{0.06})\text{O}_2:2.5\text{F}$ . (k and l) EDS analysis of  $(\text{Mn}_{0.94}\text{Ru}_{0.06})\text{O}_2:2.5\text{F}$ . (m) Inverse FFT image of  $(\text{Mn}_{0.94}\text{Ru}_{0.06})\text{O}_2:2.5\text{F}$  regarding (310) plane.

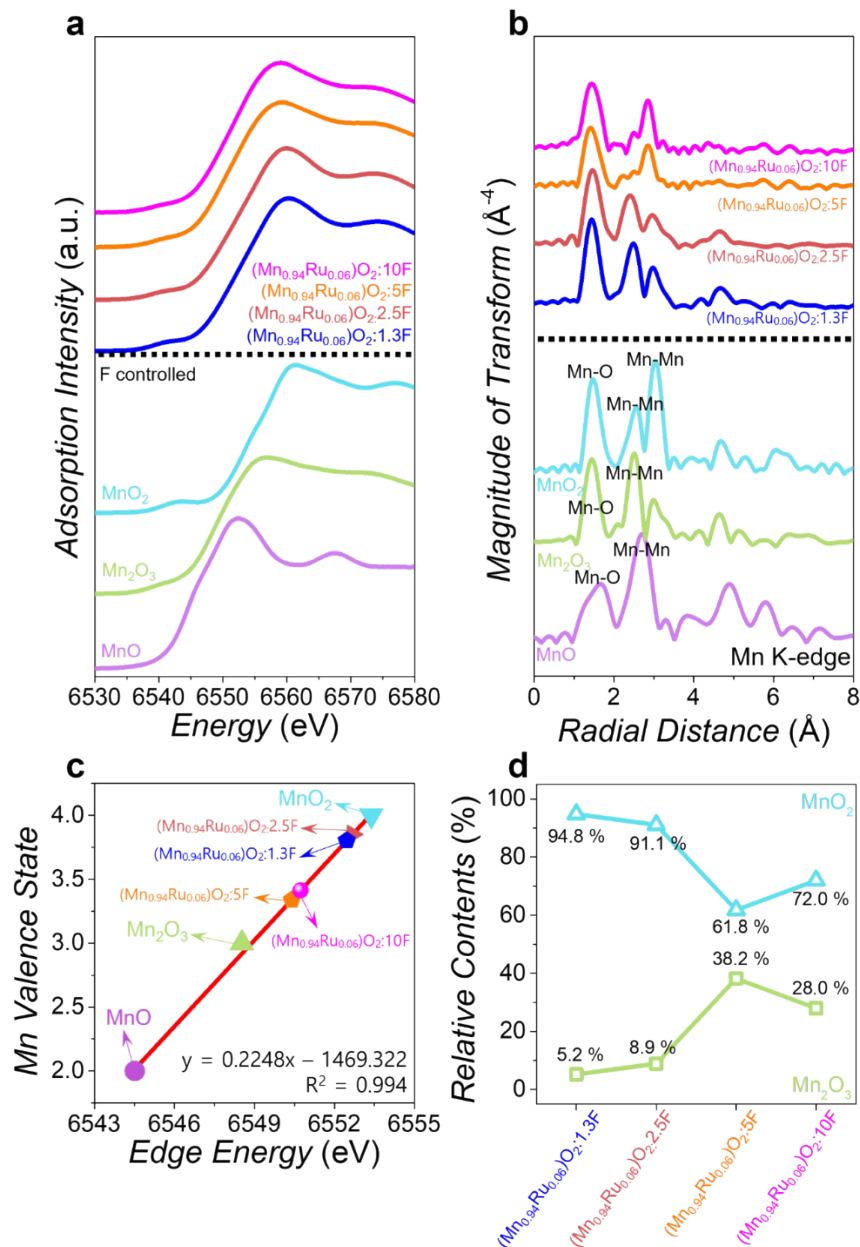

**Fig. S2** (a) Mn K-edge XANES spectra of the reference materials and as-prepared samples ( $\text{MnO}$ ,  $\text{Mn}_2\text{O}_3$ ,  $\alpha\text{-MnO}_2$ ,  $(\text{Mn}_{0.94}\text{Ru}_{0.06})\text{O}_2:1.3\text{F}$ ,  $(\text{Mn}_{0.94}\text{Ru}_{0.06})\text{O}_2:2.5\text{F}$ ,  $(\text{Mn}_{0.94}\text{Ru}_{0.06})\text{O}_2:5\text{F}$  and  $(\text{Mn}_{0.94}\text{Ru}_{0.06})\text{O}_2:10\text{F}$ ). (b) Radial distribution functions of the  $k^3$ -weighted EXAFS. (c) Linear regression of the edge energy in the XANES spectra and the Mn valence state. (d) Phase composition determined with LCF of the XANES spectra.

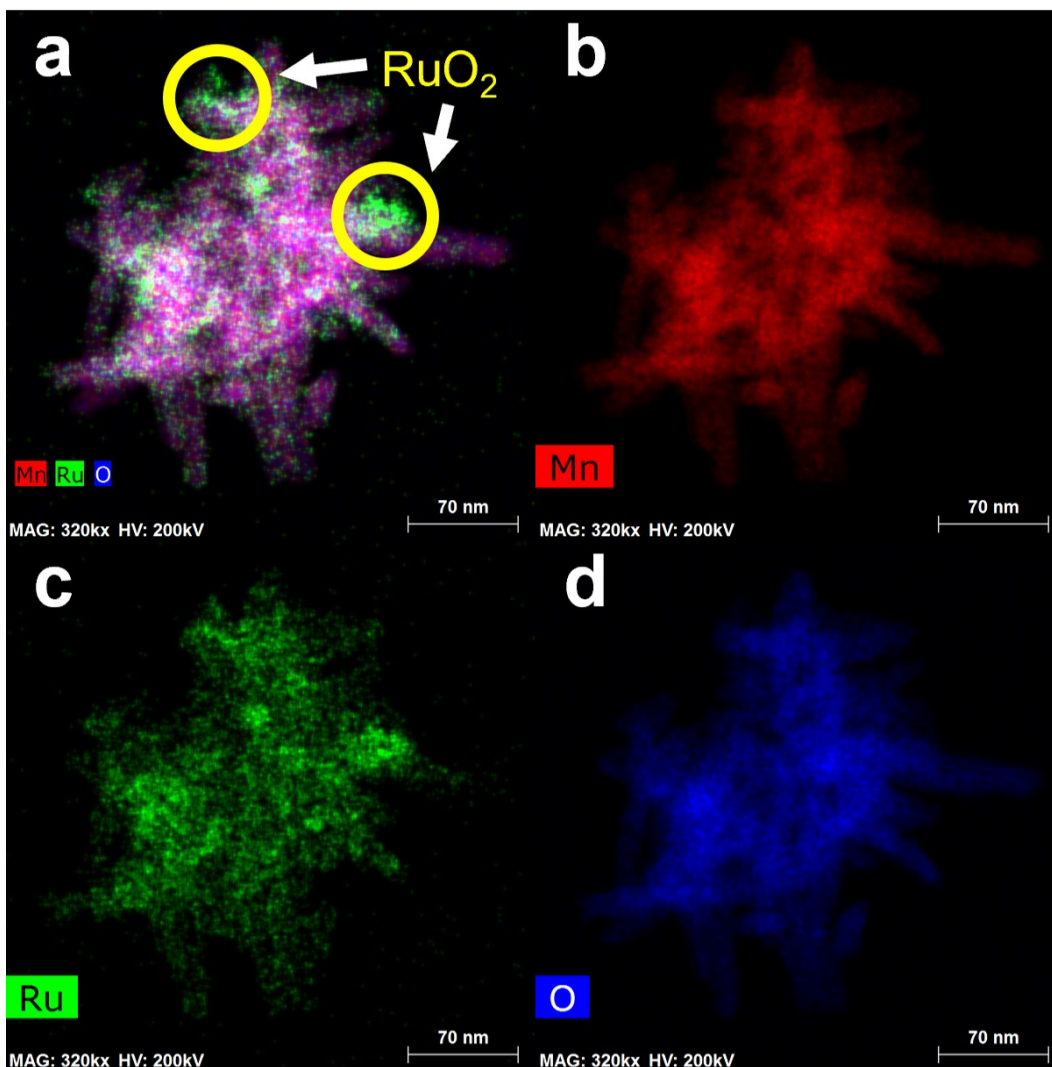

**Fig. S3** EDS elemental mapping images of  $(\text{Mn}_{0.93}\text{Ru}_{0.07})\text{O}_2:2.5\text{F}$ ; (a) overall, (b) Mn, (c) Ru and d) O.

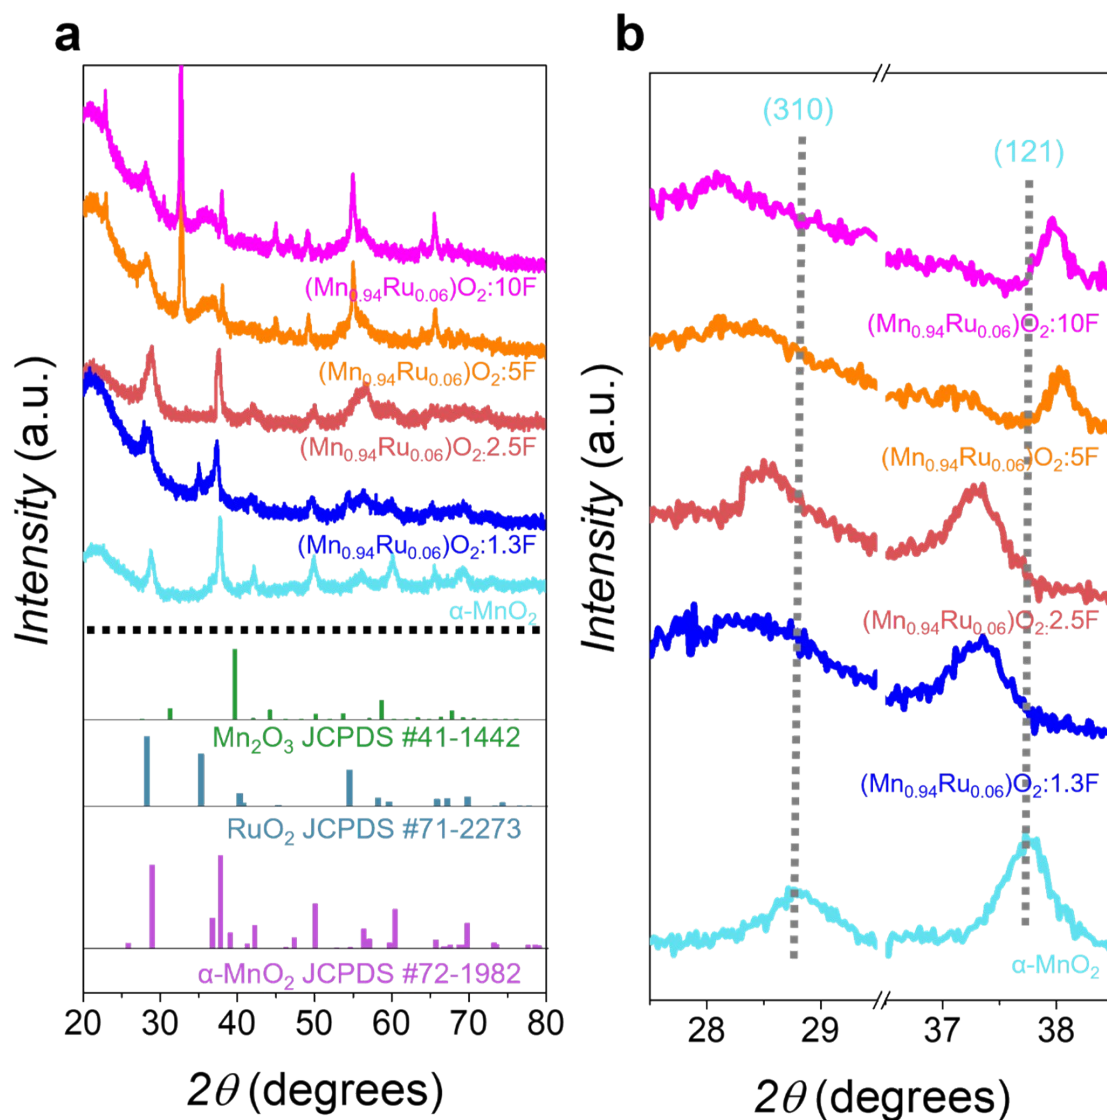

**Fig. S4** (a) XRD patterns of the standard materials and as-prepared samples  $\alpha\text{-MnO}_2$ ,  $(\text{Mn}_{0.94}\text{Ru}_{0.06})\text{O}_2:1.3\text{F}$ ,  $(\text{Mn}_{0.93}\text{Ru}_{0.07})\text{O}_2:2.5\text{F}$ ,  $(\text{Mn}_{0.94}\text{Ru}_{0.06})\text{O}_2:5\text{F}$  and  $(\text{Mn}_{0.94}\text{Ru}_{0.06})\text{O}_2:10\text{F}$ . (b) Enlarged XRD patterns in the  $2\theta$  range of  $27.5^\circ$ – $38.5^\circ$ .

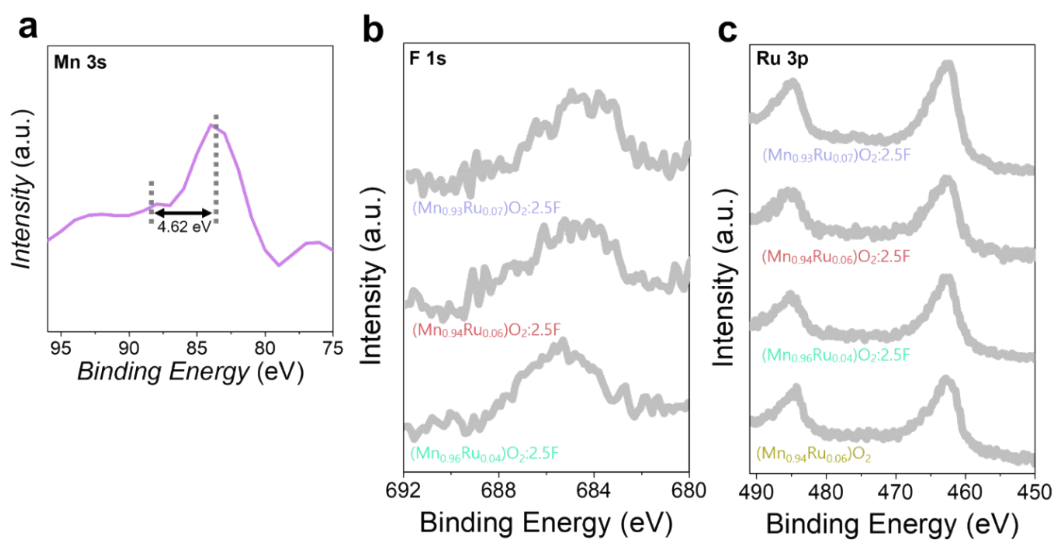

**Fig. S5** (a) Mn 3s XPS spectra of  $(\text{Mn}_{0.94}\text{Ru}_{0.06})\text{O}_2 \cdot 2.5\text{F}$ . (b) F 1s and (c) Ru 3p XPS spectra of the as-prepared samples.



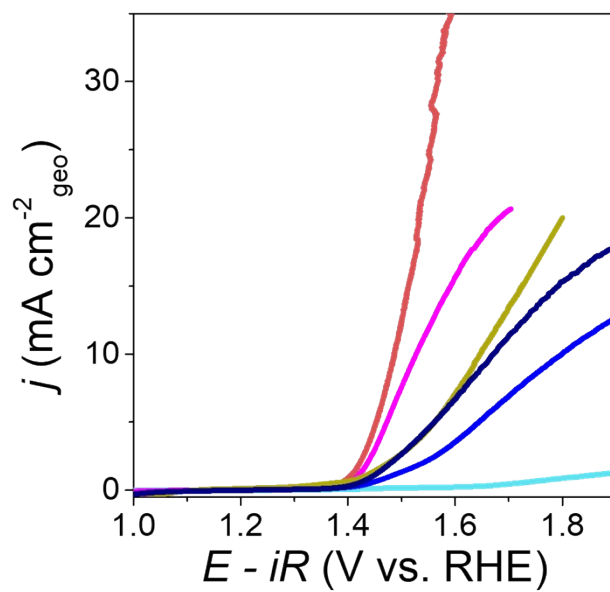

**Fig. S6** LSV curves of  $\alpha\text{-MnO}_2$ ,  $(\text{Mn}_{0.94}\text{Ru}_{0.06})\text{O}_2$ ,  $(\text{Mn}_{0.94}\text{Ru}_{0.06})\text{O}_2:1.3\text{F}$ ,  $(\text{Mn}_{0.94}\text{Ru}_{0.06})\text{O}_2:2.5\text{F}$ ,  $(\text{Mn}_{0.94}\text{Ru}_{0.06})\text{O}_2:5\text{F}$  and  $(\text{Mn}_{0.94}\text{Ru}_{0.06})\text{O}_2:10\text{F}$ .

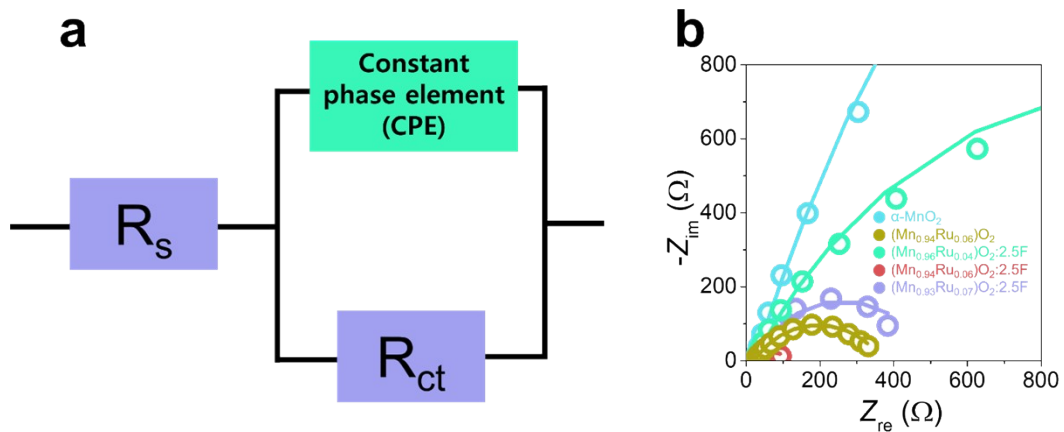

**Fig. S7** (a) Equivalent circuit used for EIS fitting. (b) Nyquist plots of the as-prepared samples.

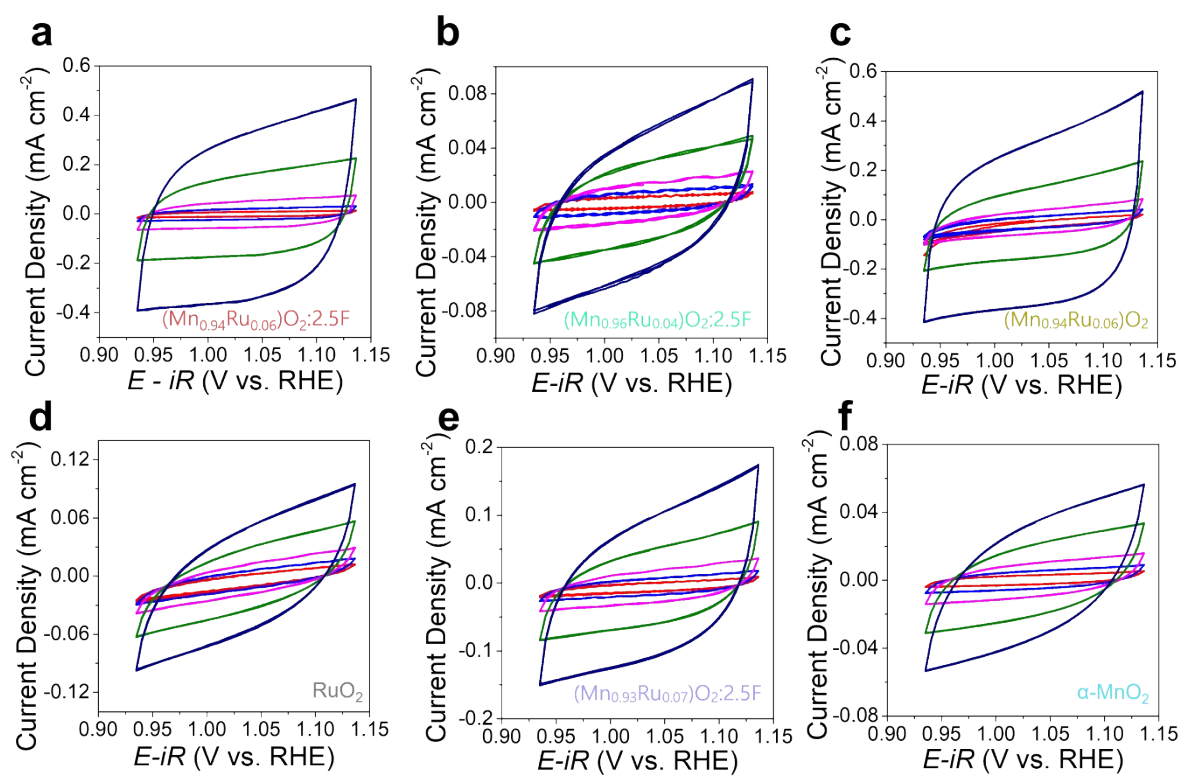

**Fig. S8** The CV curves of the as-prepared samples; (a)  $(\text{Mn}_{0.94}\text{Ru}_{0.06})\text{O}_2:2.5\text{F}$ , (b)  $(\text{Mn}_{0.96}\text{Ru}_{0.04})\text{O}_2:2.5\text{F}$ , (c)  $(\text{Mn}_{0.94}\text{Ru}_{0.06})\text{O}_2$ , (d)  $\text{RuO}_2$ , (e)  $(\text{Mn}_{0.93}\text{Ru}_{0.07})\text{O}_2:2.5\text{F}$  and (f)  $\alpha\text{-MnO}_2$ .

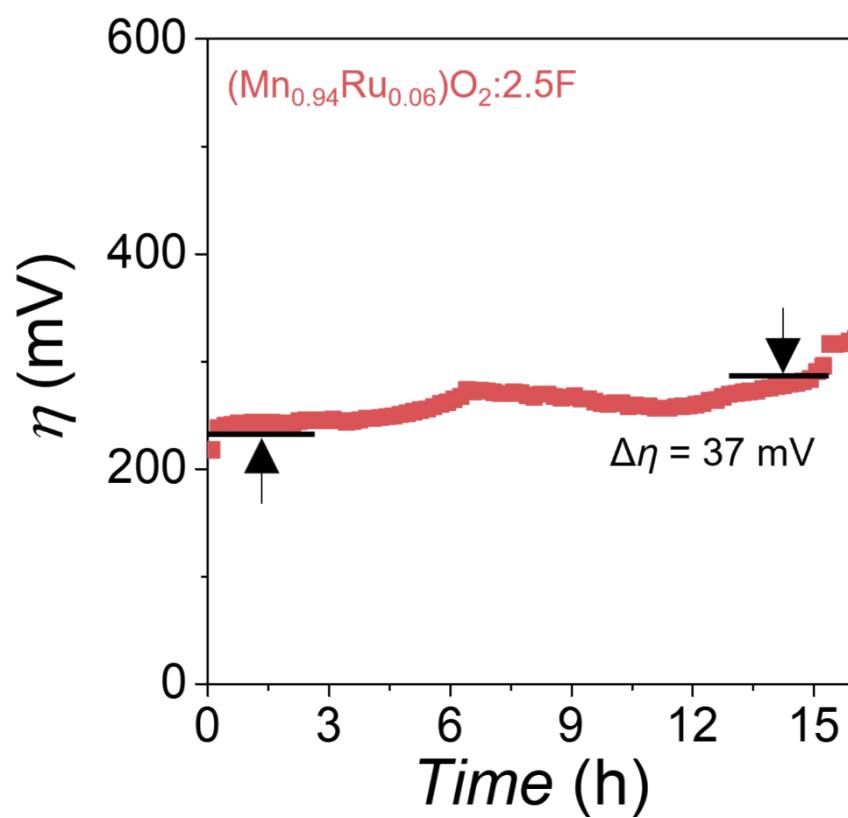

**Fig. S9** Stability test of  $(\text{Mn}_{0.94}\text{Ru}_{0.06})\text{O}_2:2.5\text{F}$  at  $10 \text{ mA cm}^{-2}$  for 15 hours.

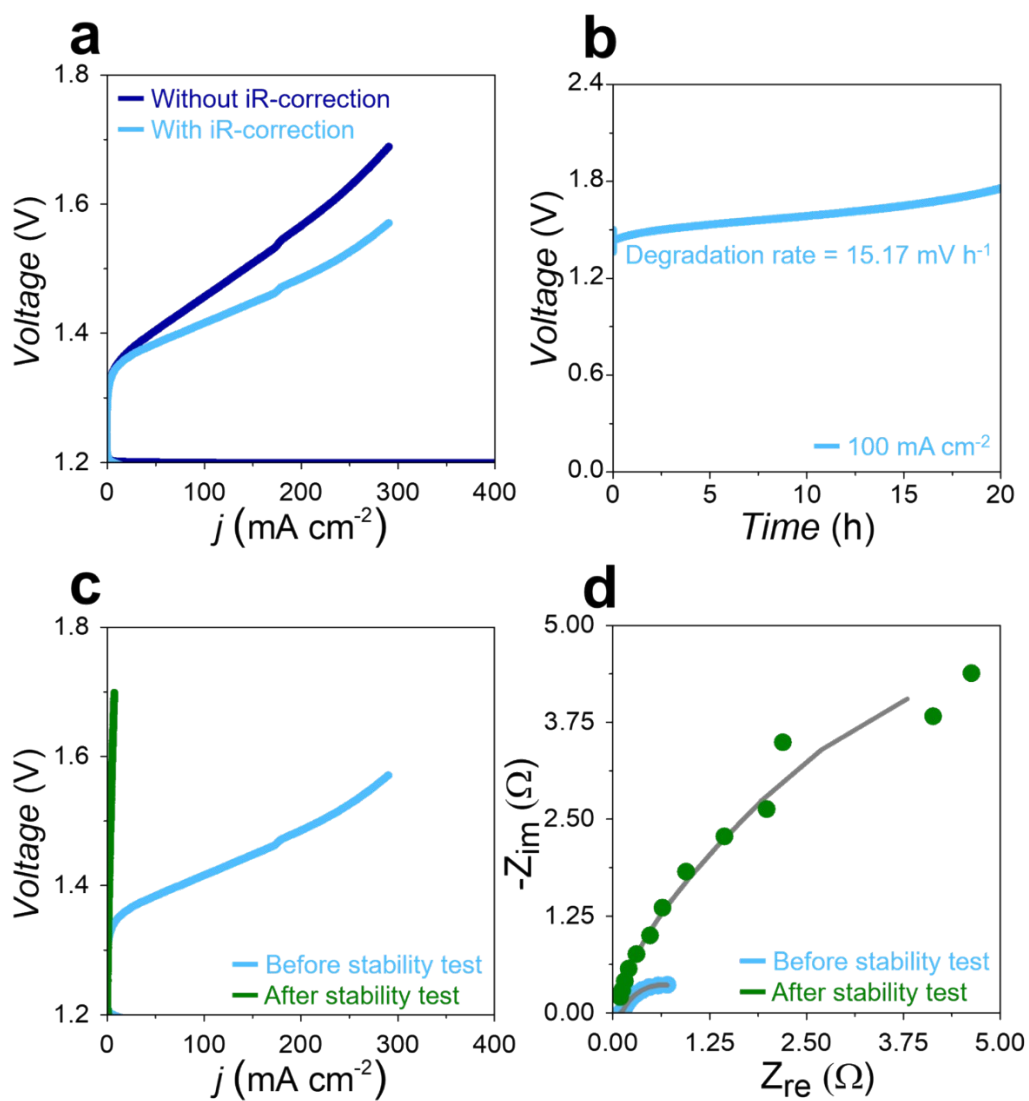

**Fig. S10** The performance of the PEMWE single-cell. (a) Polarization curves of the PEMWE with  $(\text{Mn}_{0.94}\text{Ru}_{0.06})\text{O}_2:2.5\text{F}$  anode. (b) Stability test of the PEMWE with  $(\text{Mn}_{0.94}\text{Ru}_{0.06})\text{O}_2:2.5\text{F}$  anode at  $100 \text{ mA cm}^{-2}$  for 20 hours. (c) Polarization curves of  $(\text{Mn}_{0.94}\text{Ru}_{0.06})\text{O}_2:2.5\text{F}$  with and without iR-correction. (d) Nyquist plots of the PEMWE before and after the stability test.

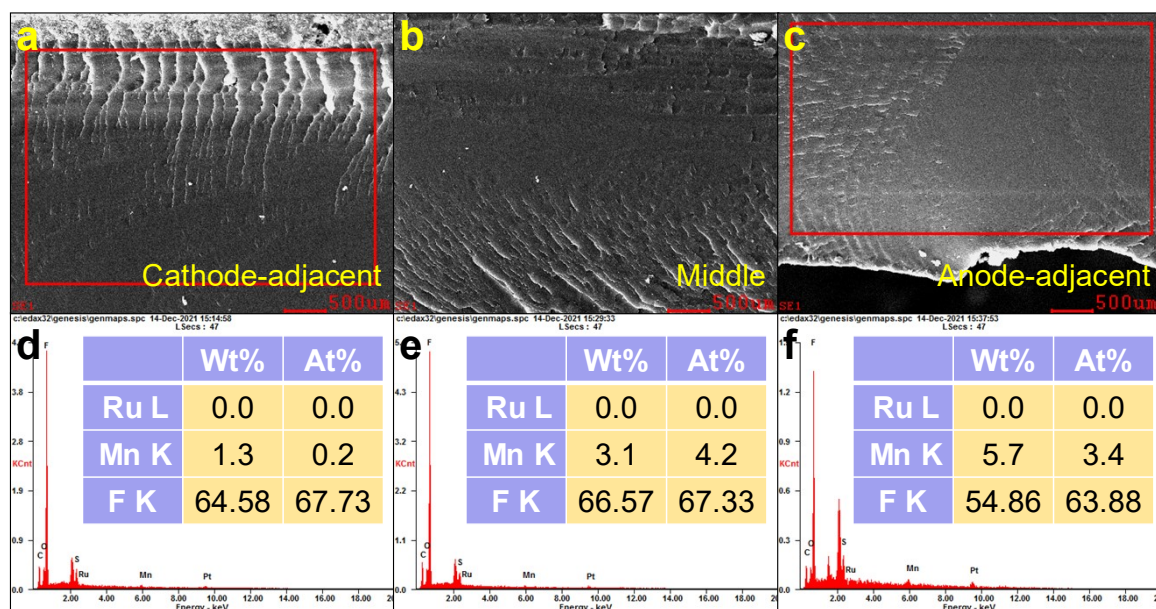

**Fig. S11** Cross-section image of pristine MEA. (a) Cathode-adjacent, (b) middle and (c) anode-adjacent images of the MEA. The EDS results of the (d) Fig. S11a, (e) Fig. S11b and (f) Fig. S11c.

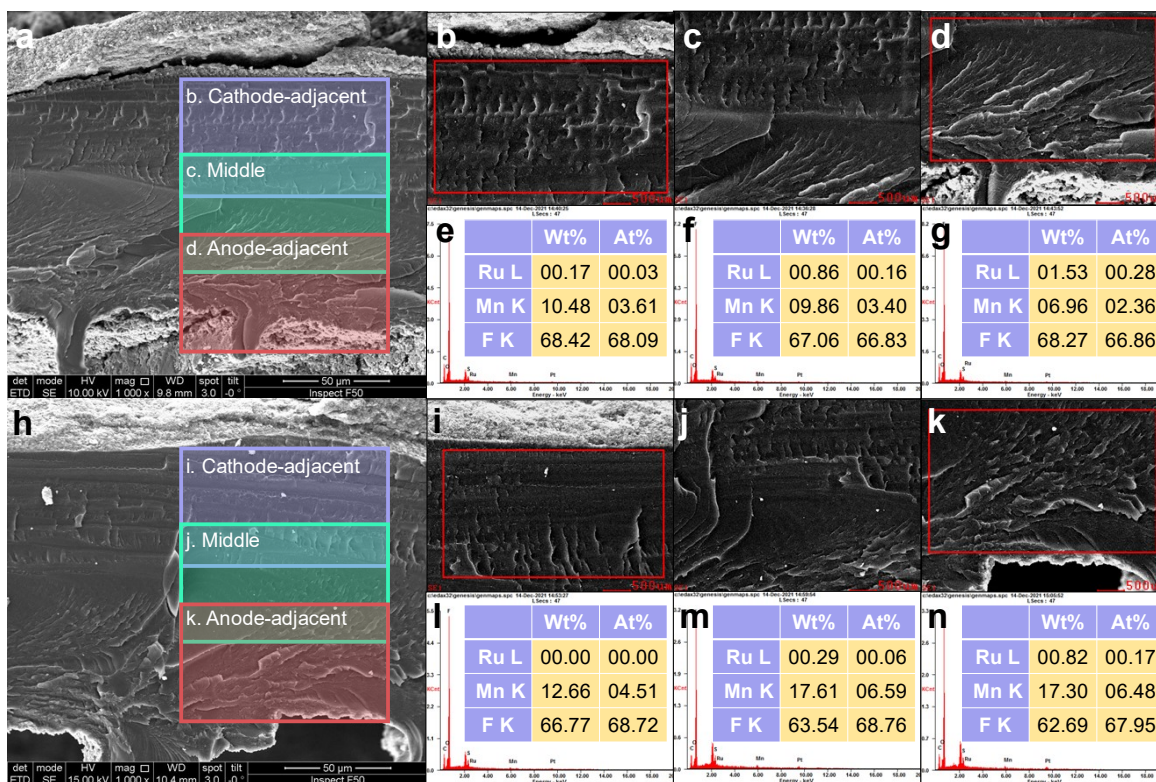

**Fig. S12** (a) The cross-section image of MEA after steady-state test at  $10 \text{ mA} \cdot \text{cm}^{-2}$  for 200 hours. The specific image of the (b) cathode-adjacent, (c) middle and (d) anode-adjacent image of MEA. The EDS results of the (e) Fig. S12b, (f) Fig. S12c and (g) Fig. S12d. (h) The image of MEA after steady-state test at  $100 \text{ mA} \cdot \text{cm}^{-2}$  for 20 hours. The specific image of the (i) cathode-adjacent, (j) middle and (k) anode-adjacent image of MEA. The EDS results of the (l) Fig. S12i, (m) Fig. S12j and (n) Fig. S12k.

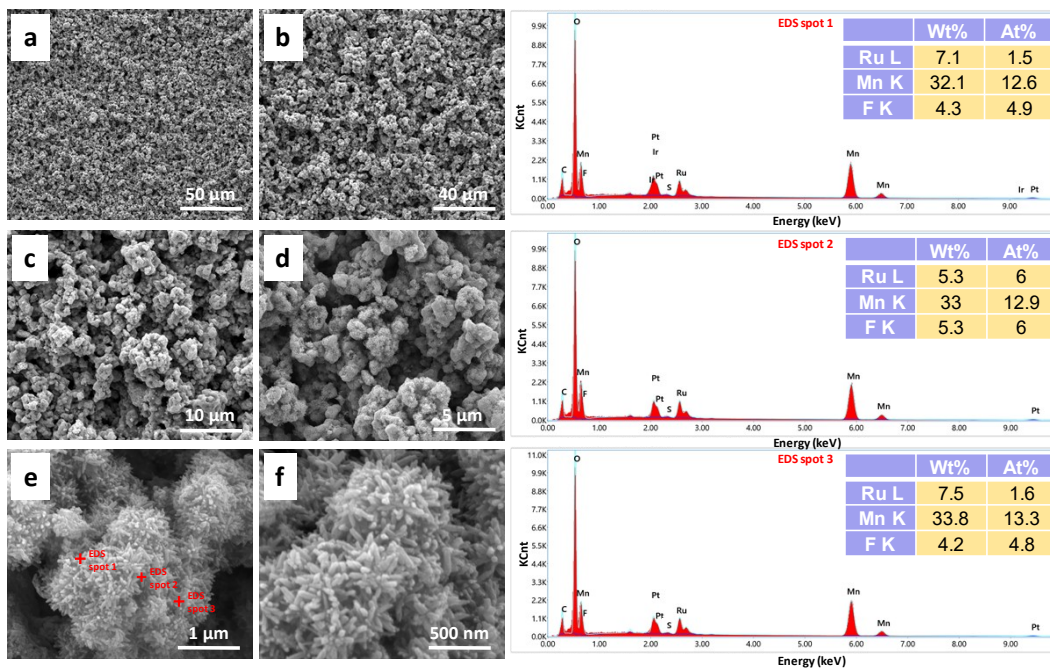

**Fig. S13** Surface SEM/EDS analyses of the pristine  $(\text{Mn}_{0.94}\text{Ru}_{0.06})\text{O}_2:2.5\text{F}$  on membrane.

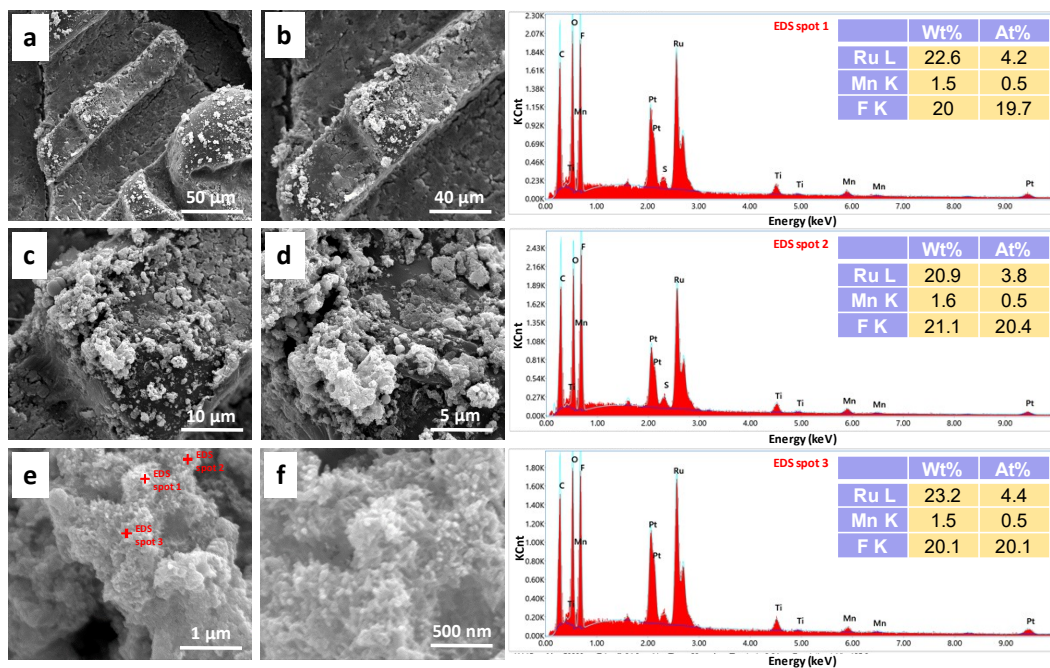

**Fig. S14** Surface SEM/EDS analyses of the  $(\text{Mn}_{0.94}\text{Ru}_{0.06})\text{O}_2:2.5\text{F}$  after steady-state test at  $10 \text{ mA} \cdot \text{cm}^{-2}$  for 200 hours.



**Table S1.** Contents of Mn and Ru determined by the quantitative EDS analysis.

| <b>Samples</b>                                             | <b>Atomic percentage</b> |                  | <b>Weight percentage</b> |                  |
|------------------------------------------------------------|--------------------------|------------------|--------------------------|------------------|
|                                                            | <b>Mn (at %)</b>         | <b>Ru (at %)</b> | <b>Mn (wt %)</b>         | <b>Ru (wt %)</b> |
| $(\text{Mn}_{0.94}\text{Ru}_{0.06})\text{O}_2$             | 30.97                    | 2.38             | 56.56                    | 8.00             |
| $(\text{Mn}_{0.96}\text{Ru}_{0.04})\text{O}_2:2.5\text{F}$ | 32.29                    | 1.53             | 59.38                    | 5.18             |
| $(\text{Mn}_{0.94}\text{Ru}_{0.06})\text{O}_2:2.5\text{F}$ | 31.52                    | 2.29             | 57.22                    | 7.65             |
| $(\text{Mn}_{0.93}\text{Ru}_{0.07})\text{O}_2:2.5\text{F}$ | 30.76                    | 3.71             | 54.28                    | 12.04            |

**Table S2** Edge energies and oxidation states determined by the Mn K-edge XANES spectra.

| Samples                                                      | Edge energy (eV) | Oxidation state |
|--------------------------------------------------------------|------------------|-----------------|
| MnO                                                          | 6544.51          | 2+              |
| Mn <sub>2</sub> O <sub>3</sub>                               | 6548.53          | 3+              |
| $\alpha$ -MnO <sub>2</sub>                                   | 6553.38          | 4+              |
| (Mn <sub>0.96</sub> Ru <sub>0.04</sub> )O <sub>2</sub> :2.5F | 6552.85          | 3.89+           |
| (Mn <sub>0.94</sub> Ru <sub>0.06</sub> )O <sub>2</sub> :2.5F | 6552.68          | 3.85+           |
| (Mn <sub>0.93</sub> Ru <sub>0.07</sub> )O <sub>2</sub> :2.5F | 6553.01          | 3.92+           |
| (Mn <sub>0.94</sub> Ru <sub>0.06</sub> )O <sub>2</sub>       | 6553.31          | 3.99+           |
| (Mn <sub>0.94</sub> Ru <sub>0.06</sub> )O <sub>2</sub> :1.3F | 6552.46          | 3.80+           |
| (Mn <sub>0.94</sub> Ru <sub>0.06</sub> )O <sub>2</sub> :5F   | 6550.40          | 3.34+           |
| (Mn <sub>0.94</sub> Ru <sub>0.06</sub> )O <sub>2</sub> :10F  | 6550.73          | 3.41+           |

**Table S3** Phase composition determined by the LCF of the Mn K-edge XANES spectra.

| <b>Samples</b>                                               | <b>MnO</b> | <b>Mn<sub>2</sub>O<sub>3</sub></b> | <b>MnO<sub>2</sub></b> |
|--------------------------------------------------------------|------------|------------------------------------|------------------------|
| (Mn <sub>0.96</sub> Ru <sub>0.04</sub> )O <sub>2</sub> :2.5F | 0.000      | 0.042                              | 0.958                  |
| (Mn <sub>0.94</sub> Ru <sub>0.06</sub> )O <sub>2</sub> :2.5F | 0.000      | 0.089                              | 0.911                  |
| (Mn <sub>0.93</sub> Ru <sub>0.07</sub> )O <sub>2</sub> :2.5F | 0.000      | 0.030                              | 0.970                  |
| (Mn <sub>0.94</sub> Ru <sub>0.06</sub> )O <sub>2</sub>       | 0.000      | 0.004                              | 0.996                  |
| (Mn <sub>0.94</sub> Ru <sub>0.06</sub> )O <sub>2</sub> :1.3F | 0.000      | 0.052                              | 0.948                  |
| (Mn <sub>0.94</sub> Ru <sub>0.06</sub> )O <sub>2</sub> :5F   | 0.000      | 0.382                              | 0.618                  |
| (Mn <sub>0.94</sub> Ru <sub>0.06</sub> )O <sub>2</sub> :10F  | 0.000      | 0.280                              | 0.720                  |

**Table S4** Shifts in the XRD peak positions for (310) and (121) planes from those of the  $\alpha$ -MnO<sub>2</sub>.

| <b>Sample</b>                                                | <b>2<math>\theta</math> for (310)<br/>(degrees)</b> | <b><math>\Delta 2\theta</math><br/>(degrees)</b> | <b>2<math>\theta</math> for (121)<br/>(degrees)</b> | <b><math>\Delta 2\theta</math><br/>(degrees)</b> |
|--------------------------------------------------------------|-----------------------------------------------------|--------------------------------------------------|-----------------------------------------------------|--------------------------------------------------|
| $\alpha$ -MnO <sub>2</sub>                                   | 28.70                                               | 0                                                | 37.76                                               | 0                                                |
| (Mn <sub>0.94</sub> Ru <sub>0.06</sub> )O <sub>2</sub>       | 28.57                                               | -0.13                                            | 37.59                                               | -0.17                                            |
| (Mn <sub>0.96</sub> Ru <sub>0.04</sub> )O <sub>2</sub> :2.5F | 28.52                                               | -0.18                                            | 37.44                                               | -0.32                                            |
| (Mn <sub>0.94</sub> Ru <sub>0.06</sub> )O <sub>2</sub> :2.5F | 28.40                                               | -0.3                                             | 37.28                                               | -0.48                                            |
| (Mn <sub>0.93</sub> Ru <sub>0.07</sub> )O <sub>2</sub> :2.5F | 28.38                                               | -0.32                                            | 37.37                                               | -0.39                                            |

**Table S5** XRD peak positions, FWHMs, crystallite sizes and d-spacing values for the (121) plane, determined by Scherrer analysis.

| Sample                                                       | 2 $\theta$ for (121) (degrees) | $\theta$ (degrees) | FWHM  | Crystallite size (nm) | d-spacing (nm) |
|--------------------------------------------------------------|--------------------------------|--------------------|-------|-----------------------|----------------|
| $\alpha$ -MnO <sub>2</sub>                                   | 37.75                          | 18.87              | 0.522 | 16                    | 0.238          |
| (Mn <sub>0.94</sub> Ru <sub>0.06</sub> )O <sub>2</sub>       | 37.59                          | 18.79              | 0.517 | 16                    | 0.239          |
| (Mn <sub>0.96</sub> Ru <sub>0.04</sub> )O <sub>2</sub> :2.5F | 37.44                          | 18.72              | 0.510 | 16                    | 0.240          |
| (Mn <sub>0.94</sub> Ru <sub>0.06</sub> )O <sub>2</sub> :2.5F | 37.28                          | 18.64              | 0.513 | 16                    | 0.241          |
| (Mn <sub>0.93</sub> Ru <sub>0.07</sub> )O <sub>2</sub> :2.5F | 37.37                          | 18.68              | 0.513 | 16                    | 0.241          |

**Table S6** XPS peak position determined from deconvolution of Mn 2p XPS spectra.

| Samples                                                      | Peak position             |                           |                           |                           |
|--------------------------------------------------------------|---------------------------|---------------------------|---------------------------|---------------------------|
|                                                              | Mn 2p <sub>3/2</sub> (eV) | Mn 2p <sub>1/2</sub> (eV) | Mn 2p <sub>3/2</sub> (eV) | Mn 2p <sub>1/2</sub> (eV) |
| $\alpha$ -MnO <sub>2</sub>                                   | 642.8                     | 654.5                     | 641.6                     | 653.4                     |
| (Mn <sub>0.94</sub> Ru <sub>0.06</sub> )O <sub>2</sub>       | 642.8                     | 653.6                     | 640.9                     | 652.6                     |
| (Mn <sub>0.96</sub> Ru <sub>0.04</sub> )O <sub>2</sub> :2.5F | 642.6                     | 653.9                     | 641.3                     | 652.9                     |
| (Mn <sub>0.94</sub> Ru <sub>0.06</sub> )O <sub>2</sub> :2.5F | 642.6                     | 653.9                     | 641.3                     | 652.9                     |
| (Mn <sub>0.93</sub> Ru <sub>0.07</sub> )O <sub>2</sub> :2.5F | 642.4                     | 653.7                     | 641.1                     | 652.7                     |

**Table S7** XPS peak position determined from the deconvolution of O 1s XPS spectra.

| Samples                                                      | O 1s (eV)      |                |                |
|--------------------------------------------------------------|----------------|----------------|----------------|
|                                                              | Lattice oxygen | Oxygen vacancy | Adsorbed water |
| $\alpha$ -MnO <sub>2</sub>                                   | 529.7          | 531.3          | 533.0          |
| (Mn <sub>0.94</sub> Ru <sub>0.06</sub> )O <sub>2</sub>       | 529.0          | 530.5          | 531.9          |
| (Mn <sub>0.96</sub> Ru <sub>0.04</sub> )O <sub>2</sub> :2.5F | 529.2          | 530.8          | 532.8          |
| (Mn <sub>0.94</sub> Ru <sub>0.06</sub> )O <sub>2</sub> :2.5F | 529.0          | 530.6          | 532.6          |
| (Mn <sub>0.93</sub> Ru <sub>0.07</sub> )O <sub>2</sub> :2.5F | 529.0          | 530.7          | 532.6          |

**Table S8** XPS peak area ratio of Mn<sup>3+</sup>/Mn<sup>4+</sup> and O<sub>V</sub>/O<sub>L</sub> determined by the deconvolution of XPS spectra.

| Samples                                                      | Mn <sup>3+</sup> /Mn <sup>4+</sup> | O <sub>V</sub> /O <sub>L</sub> |
|--------------------------------------------------------------|------------------------------------|--------------------------------|
| $\alpha$ -MnO <sub>2</sub>                                   | 0.586                              | 0.558                          |
| (Mn <sub>0.94</sub> Ru <sub>0.06</sub> )O <sub>2</sub>       | 0.529                              | 0.472                          |
| (Mn <sub>0.96</sub> Ru <sub>0.04</sub> )O <sub>2</sub> :2.5F | 0.819                              | 0.706                          |
| (Mn <sub>0.94</sub> Ru <sub>0.06</sub> )O <sub>2</sub> :2.5F | 0.936                              | 0.806                          |
| (Mn <sub>0.93</sub> Ru <sub>0.07</sub> )O <sub>2</sub> :2.5F | 0.919                              | 0.730                          |

**Table S9** XPS peak positions for F 1s and Ru 3p XPS spectra.

| Samples                                                      | F 1s<br>(eV) | Ru <sup>4+</sup>             |                              | Ru <sup>0</sup>              |                              |
|--------------------------------------------------------------|--------------|------------------------------|------------------------------|------------------------------|------------------------------|
|                                                              |              | Ru 3p <sub>3/2</sub><br>(eV) | Ru 3p <sub>1/2</sub><br>(eV) | Ru 3p <sub>3/2</sub><br>(eV) | Ru 3p <sub>1/2</sub><br>(eV) |
| (Mn <sub>0.94</sub> Ru <sub>0.06</sub> )O <sub>2</sub>       | -            | 463.7                        | 485.9                        | 461.9                        | 484.1                        |
| (Mn <sub>0.96</sub> Ru <sub>0.04</sub> )O <sub>2</sub> :2.5F | 685.4        | 463.7                        | 485.9                        | 461.9                        | 484.1                        |
| (Mn <sub>0.94</sub> Ru <sub>0.06</sub> )O <sub>2</sub> :2.5F | 685.0        | 463.7                        | 485.9                        | 461.9                        | 484.1                        |
| (Mn <sub>0.93</sub> Ru <sub>0.07</sub> )O <sub>2</sub> :2.5F | 684.6        | 463.7                        | 485.9                        | 461.9                        | 484.1                        |

**Table S10** Series and charge transfer resistances obtained from the EIS analysis.

| Samples                                                      | R <sub>s</sub><br>(Ω) | R <sub>ct</sub><br>(Ω) |
|--------------------------------------------------------------|-----------------------|------------------------|
| α-MnO <sub>2</sub>                                           | 23.7                  | 10126                  |
| (Mn <sub>0.94</sub> Ru <sub>0.06</sub> )O <sub>2</sub>       | 31.9                  | 346                    |
| (Mn <sub>0.96</sub> Ru <sub>0.04</sub> )O <sub>2</sub> :2.5F | 22.7                  | 7799                   |
| (Mn <sub>0.94</sub> Ru <sub>0.06</sub> )O <sub>2</sub> :2.5F | 30.0                  | 86                     |
| (Mn <sub>0.93</sub> Ru <sub>0.07</sub> )O <sub>2</sub> :2.5F | 22.5                  | 460                    |

**Table S11** OER activity in terms of overpotential at  $10 \text{ mA}\cdot\text{cm}^{-2}$ , Tafel slopes,  $C_{dl}$ , and ECSA.

| Samples                                                    | $\eta$ at 10 mA<br>$\text{cm}^{-2}$ (mV) | Tafel slope<br>( $\text{mV dec}^{-1}$ ) | $C_{dl}$<br>(mF) | ECSA<br>( $\text{cm}^2$ ) |
|------------------------------------------------------------|------------------------------------------|-----------------------------------------|------------------|---------------------------|
| $\alpha\text{-MnO}_2$                                      | n.a.                                     | 364                                     | 0.07             | 2.0                       |
| $(\text{Mn}_{0.94}\text{Ru}_{0.06})\text{O}_2$             | 421                                      | 97                                      | 0.65             | 18.6                      |
| $(\text{Mn}_{0.96}\text{Ru}_{0.04})\text{O}_2:2.5\text{F}$ | 766                                      | 133                                     | 0.10             | 2.9                       |
| $(\text{Mn}_{0.94}\text{Ru}_{0.06})\text{O}_2:2.5\text{F}$ | 257                                      | 62                                      | 0.66             | 18.9                      |
| $(\text{Mn}_{0.93}\text{Ru}_{0.07})\text{O}_2:2.5\text{F}$ | 642                                      | 99                                      | 0.19             | 5.4                       |

**Table S12** OER activity comparison of Mn and noble-metal-based catalysts in terms of loading, overpotential at  $10 \text{ mA}\cdot\text{cm}^{-2}$  and mass activity.

| Samples                                                 | Loading<br>( $\text{mg cm}^{-2}$ ) | Noble metal<br>loading<br>( $\text{mg cm}^{-2}$ ) | $\eta$<br>(mV) | Mass<br>activity<br>( $\text{mA mg}^{-1}$ ) | Reference |
|---------------------------------------------------------|------------------------------------|---------------------------------------------------|----------------|---------------------------------------------|-----------|
| $(\text{Mn}_{0.7}\text{Ir}_{0.3})\text{O}_2:10\text{F}$ | 0.3                                | 0.135                                             | 245            | 74.06                                       | [S1]      |
| $(\text{Mn}_{0.8}\text{Ir}_{0.2})\text{O}_2:10\text{F}$ | 0.3                                | 0.101                                             | 200            | 99.18                                       | [S1]      |
| $(\text{Mn}_{0.8}\text{Nb}_{0.2})\text{O}_2:10\text{F}$ | 0.3                                | 0.059                                             | 680            | 169.60                                      | [S2]      |
| $\text{Ir}_{0.4}/\text{Mn}_{0.6}$                       | 0.2                                | 0.108                                             | 237            | 92.24                                       | [S3]      |
| $\text{RuO}_2/(\text{Co},\text{Mn})_3\text{O}_4$        | n.a.                               | 0.06                                              | 270            | 166.67                                      | [S4]      |
| $\text{Ir-MnO}_2$                                       | 4                                  | 0.205                                             | 218            | 48.73                                       | [S5]      |
| $\text{Mn-RuO}_2$                                       | 0.275                              | 0.196                                             | 158            | 50.93                                       | [S6]      |
| $12\text{Ru}/\text{MnO}_2$                              | 0.2                                | 0.023                                             | 161            | 434.8                                       | [S7]      |
| This work                                               | 0.216                              | 0.017                                             | 250            | 588.24                                      | This work |



**Table S13** Contents of Mn and Ru in electrolyte after stability test, determined by the ICP-MS analysis.

| Sample                                                       | Mn (ppm) | Ru (ppm) |
|--------------------------------------------------------------|----------|----------|
| (Mn <sub>0.94</sub> Ru <sub>0.06</sub> )O <sub>2</sub> :2.5F | 3.157    | 0.053    |

**Table S14** Contents of Mn, Ru and F in membrane after stability test at 10 mA cm<sup>-2</sup> and 100 mA cm<sup>-2</sup>.

| MEA sector       | 10 mA cm <sup>-2</sup> |          |         | 100 mA cm <sup>-2</sup> |          |         |
|------------------|------------------------|----------|---------|-------------------------|----------|---------|
|                  | Mn (at%)               | Ru (at%) | F (at%) | Mn (at%)                | Ru (at%) | F (at%) |
| Cathode-adjacent | 3.61                   | 0.03     | 68.09   | 4.51                    | 0.00     | 68.72   |
| Middle           | 3.40                   | 0.16     | 66.83   | 6.59                    | 0.06     | 68.76   |
| Anode-adjacent   | 2.36                   | 0.28     | 66.86   | 6.48                    | 0.17     | 67.95   |

**Table S15** Relative contents of Mn, Ru and F in catalyst layer before the stability test at 10 mA cm<sup>-2</sup> (normalized data considering only Mn, Ru and F).

| MEA sector | 10 mA cm <sup>-2</sup> |          |         |
|------------|------------------------|----------|---------|
|            | Mn (at%)               | Ru (at%) | F (at%) |
| Point 1    | 66.3                   | 7.9      | 25.8    |
| Point 2    | 62.9                   | 7.8      | 29.3    |
| Point 3    | 67.5                   | 8.1      | 24.4    |
| Average    | 65.6                   | 7.8      | 26.5    |

**Table S16** Relative contents of Mn, Ru and F in catalyst layer after stability test at 10 mA cm<sup>-2</sup> (normalized data considering only Mn, Ru and F).

| MEA sector | 10 mA cm <sup>-2</sup> |          |         |
|------------|------------------------|----------|---------|
|            | Mn (at%)               | Ru (at%) | F (at%) |
| Point 1    | 2.0                    | 17.2     | 80.7    |
| Point 2    | 2.0                    | 15.4     | 82.6    |
| Point 3    | 2.0                    | 17.6     | 80.4    |
| Average    | 2.0                    | 16.7     | 81.2    |

## References

- [S1] S. D. Ghadge, P. P. Patel, M. K. Datta, O. I. Velikokhatnyi, R. Kuruba, P. M. Shanthi and P. N. Kumta, *RSC Adv.*, 2017, **7**, 17311–17324.
- [S2] S. D. Ghadge, O. I. Velikokhatnyi, M. K. Datta, P. M. Shanthi, S. Tan and P. N. Kumta, *ACS Appl. Energy Mater.*, 2020, **3**, 541–557.
- [S3] S. Chen, H. Huang, P. Jiang, K. Yang, J. Diao, S. Gong, S. Liu, M. Huang, H. Wang and Q. Chen, *ACS Catal.*, 2020, **10**, 1152–1160.
- [S4] S. Niu, X.-P. Kong, S. Li, Y. Zhang, J. Wu, W. Zhao and P. Xu, *Appl. Catal., B*, 2021, **297**, 120442.
- [S5] Z. Shi, Y. Wang, J. Li, X. Wang, Y. Wang, Y. Li, W. Xu, Z. Jiang, C. Liu, W. Xing and J. Ge, *Joule*, 2021, **5**, 2164–2176.
- [S6] S. Chen, H. Huang, P. Jiang, K. Yang, J. Diao, S. Gong, S. Liu, M. Huang, H. Wang and Q. Chen, *ACS Catal.*, 2020, **10**, 1152–1160.
- [S7] C. Lin, J.-L. Li, X. Li, S. Yang, W. Luo, Y. Zhang, S.-H. Kim, D.-H. Kim, S. S. Shinde, Y.-F. Li, Z.-P. Liu, Z. Jiang and J.-H. Lee, *Nat. Catal.*, 2021, **4**, 1012–1023.
